# Supplementary material for: Sorting of secretory proteins at the trans-Golgi network by human TGN46
Source: eLife journal article supplement (doi:10.7554/elife.91708), 2023-10-24
Supplement: data1 [file Fig1A.xlsx]

## Sheet: Sheet1
			TGN46 KO
				Ctrl		BFA		Bafilo					Secreted PAUF
				TGN46	tubulin	TGN46	tubulin	TGN46	tubulin	Average				Ctrl	BFA	Bafilo
	1st experiment		HeLa WT	40483.1	11339.3	52614.4	10709.2	53125.7	12681.5			WT	PAUFin	9542.55	16559.3	17657.8
	210728		HeLa KO	2148.65	9001.92	2683.82	5881.59	2175.99	6816.25				PAUFout	29970.4	280.95	22970.4
			% TGN46 left	6.68565		9.28778		7.62039		7.86461			ratio out/in	3.14071	0.0169663	1.30086
												KO	PAUFin	19296.2	22630.4	26933.4
													PAUFout	14812.4	97.192	6985.17
													ratio out/in	0.767632	0.00429475	0.259349
			TGN46 KO
				Ctrl		BFA		Bafilo					Secreted PAUF
				TGN46	tubulin	TGN46	tubulin	TGN46	tubulin	Average				Ctrl	BFA	Bafilo
	2st experiment		HeLa WT	28989.8	6941.74	28794.5	6439.45	27839.3	7108.03			WT	PAUFin	9402.77	12104.9	10889.3
	210817		HeLa KO	876.95	3283.81	150.121	2938.2	38.121	2594.96				PAUFout	14333.1	165.536	10259.2
			% TGN46 left	6.39469		1.14261		0.375081		2.63746			ratio out/in	1.52435	0.0136751	0.942143
												KO	PAUFin	16842.1	16013.8	30383.5
													PAUFout	14378.2	70.121	6204.68
													ratio out/in	0.853709	0.00437878	0.204212
			TGN46 KO
				Ctrl		BFA							Secreted PAUF
				TGN46	tubulin	TGN46	tubulin	Average						Ctrl	BFA
	3st experiment		HeLa WT	10631.5	3329.94	10700.1	2526.48					WT	PAUFin	2886.45	6530.17
	210825		HeLa KO	536.991	1360.41	117.364	1512.28						PAUFout	25310	78.121
			% TGN46 left	12.3635		1.83243		7.09796					ratio out/in	8.76858	0.0119631
												KO	PAUFin	6898.7	7680.07
													PAUFout	12949.5	12.121
													ratio out/in	1.8771	0.00157824
			TGN46 KO
				Ctrl		BFA							Secreted PAUF
				TGN46	tubulin	TGN46	tubulin	Average						Ctrl	BFA
	4st experiment		HeLa WT	43685.1	5493.96	23895.1	7056.62					WT	PAUFin	11948.8	13777.4
	210827		HeLa KO	3852	3183.01	675.92	1789.82						PAUFout	17148.3	150.121
			% TGN46 left	15.2195		11.1525		13.186					ratio out/in	1.43514	0.0108962
												KO	PAUFin	17522.5	24820.6
													PAUFout	12172.8	62.121
													ratio out/in	0.694693	0.0025028
			AVERAGE KO		7.69651
							Untreated				BFA
						HeLa WT	3.14071	1.52435	8.76858	1.43514	0.016966	0.013675	0.011963	0.010896
						HeLa TGN46 KO	0.767632	0.853709	1.8771	0.694693	0.004295	0.004379	0.001578	0.002503
						HeLa WT	84.4915	41.0081	235.892	38.6082	0.456419	0.367885	0.321829	0.293124
						HeLa TGN46 KO	20.6508	22.9665	50.4977	18.6886	0.115544	0.117804	0.0424513	0.0673357
