# Supplementary material for: Sorting of secretory proteins at the trans-Golgi network by human TGN46
Source: eLife journal article supplement (doi:10.7554/elife.91708), 2023-10-24
Supplement: data1 [file Fig1B-FigS1C.xlsx]

## Sheet: Sheet 1
		Hela WT										Hela KO
		VSVG	PAUF	Co-loc	% coloc red	Area (um2)	PAUF/um2	VSVG/um2	Pauf ves per VSVG ves			VSVG	PAUF	Co-loc	% coloc red	Area (um2)	PAUF/um2	VSVG/um2	Pauf ves per VSVG ves
		312	148	28	18.9189	698.521	0.211876	0.446658	0.422535			291	59	20	33.8983	934.586	0.0631296	0.311368	0.143911
		412	110	28	25.4545	906.899	0.121292	0.454295	0.213542			182	66	6	9.09091	1015.53	0.0649904	0.179216	0.340909
		301	97	27	27.8351	782.144	0.124018	0.38484	0.255474			314	48	11	22.9167	940.516	0.0510358	0.333859	0.122112
		370	112	13	11.6071	766.543	0.146111	0.482687	0.277311			339	59	10	16.9492	876.685	0.067299	0.386684	0.148936
		340	106	13	12.2642	485.599	0.218287	0.700166	0.284404			142	21	5	23.8095	485.715	0.0432352	0.292353	0.116788
		389	176	31	17.6136	1210.87	0.14535	0.321256	0.405028			364	33	1	3.0303	491.578	0.0671308	0.740473	0.0881543
		417	157	24	15.2866	1167.51	0.134474	0.35717	0.338422			373	151	5	3.31126	923.095	0.16358	0.404075	0.396739
		409	213	12	5.6338	689.093	0.309102	0.593534	0.506297			407	88	16	18.1818	969.231	0.0907936	0.419921	0.184143
		320	154	26	16.8831	659.047	0.233671	0.48555	0.435374			383	101	23	22.7723	1550.07	0.0651586	0.247086	0.216667
		372	168	27	16.0714	572.553	0.293423	0.649722	0.408696			183	84	16	19.0476	532.356	0.157789	0.343755	0.407186
		342	86	25	29.0698	869.354	0.098924	0.393396	0.192429			286	38	6	15.7895	777.465	0.0488768	0.367862	0.114286
		622	98	26	26.5306	1160.44	0.0844507	0.536003	0.120805			635	122	12	9.83607	929.528	0.131249	0.683142	0.176565
		266	103	26	25.2427	1053.66	0.0977542	0.252453	0.320833			393	53	6	11.3208	760.441	0.0696964	0.516805	0.121447
		430	201	30	14.9254	1352.41	0.148624	0.317952	0.4275			571	165	17	10.303	762.732	0.216328	0.748625	0.267148
		793	223	41	18.3857	1614.2	0.138149	0.491264	0.242021			487	115	8	6.95652	584.341	0.196803	0.833417	0.223382
		843	208	54	25.9615	1504.4	0.138261	0.560357	0.195184			246	49	6	12.2449	685.191	0.0715129	0.359024	0.179167
		528	176	28	15.9091	1044.82	0.168451	0.505352	0.296			416	38	6	15.7895	1055.31	0.0360085	0.394198	0.0780488
		239	77	18	23.3766	529.229	0.145495	0.4516	0.266968			626	71	3	4.22535	816.795	0.0869251	0.76641	0.109149
		446	130	32	24.6154	835.024	0.155684	0.534116	0.236715			543	55	5	9.09091	681.224	0.080737	0.797095	0.0929368
		710	156	48	30.7692	1098.21	0.142049	0.646506	0.163142			126	24	3	12.5	296.772	0.0808702	0.424568	0.170732
		303	93	25	26.8817	494.787	0.18796	0.612385	0.244604			378	19	0	0	501.162	0.0379119	0.754247	0.0502646
		391	120	36	30	447.758	0.268002	0.87324	0.23662			402	18	3	16.6667	1030.35	0.0174698	0.390159	0.037594
		310	109	19	17.4312	399.986	0.27251	0.775027	0.309278			1414	91	28	30.7692	1833.1	0.0496426	0.77137	0.0454545
		323	97	32	32.9897	451.108	0.215026	0.716015	0.223368			571	88	15	17.0455	1099.95	0.0800039	0.519116	0.131295
		529	116	50	43.1034	1177.4	0.0985222	0.449295	0.137787			665	35	11	31.4286	1018.79	0.0343545	0.652736	0.0366972
		471	96	28	29.1667	953.308	0.100702	0.494069	0.153499			418	60	23	38.3333	1148.05	0.0522628	0.364097	0.0936709
		1195	176	19	10.7955	1083.03	0.162507	1.10338	0.133503			264	45	14	31.1111	589.328	0.0763582	0.447968	0.124
		551	111	33	29.7297	1171.44	0.094755	0.47036	0.150579			1016	79	21	26.5823	1569.57	0.0503324	0.647312	0.0582915
		317	64	28	43.75	810.026	0.0790098	0.391345	0.124567			778	79	25	31.6456	1327.28	0.0595202	0.586161	0.0717131
		305	106	26	24.5283	999.952	0.106005	0.305015	0.286738			250	75	21	28	675.688	0.110998	0.369993	0.235808
