# Supplementary material for: Sorting of secretory proteins at the trans-Golgi network by human TGN46
Source: eLife journal article supplement (doi:10.7554/elife.91708), 2023-10-24
Supplement: data1 [file FigS3B.xlsx]

## Sheet: Analysis
		20150410					20150421		20150423
																															av	n	stdev	sem
eth	TGN46-GFP+TGN46-mRFP	0.783	0.828	0.978	0.972	0.948	0.848	0.968	0.937	0.913																					0.908333	9	0.0713144	0.0237715	1
	TGN46-DeltaAA-GFP+TGN46-mRFP	0.736	0.906				0.954	0.896	0.92	0.933																					0.890833	6	0.0785479	0.032067	0.661801
	TGN46-DeltaAAIL-GFP+TGN46-mRFP	0.847	0.734				0.937	0.961	0.966	0.969																					0.902333	6	0.0943815	0.0385311	0.89034
	TGN46-GFP+ST-mCherry	0.848	0.871				0.812	0.843	0.875	0.803																					0.842	6	0.0296243	0.0120941	1
	TGN46-DeltaAA-GFP+ST-mCherry	0.713	0.808	0.809			0.834	0.782	0.908	0.637																					0.784429	7	0.0873019	0.032997	0.153502
	TGN46-DeltaAAIL-GFP+ST-mCherry	0.709	0.828				0.741	0.89	0.873	0.932	0.837																				0.83	7	0.0800708	0.0302639	0.734621
cer	TGN46-GFP+TGN46-mRFP	0.967	0.908	0.907	0.97	0.971	0.963	0.978	0.961	0.964																					0.954333	9	0.0270278	0.00900925	1
	TGN46-DeltaAA-GFP+TGN46-mRFP	0.949	0.965				0.968	0.938	0.917	0.928	0.93																				0.942143	7	0.0192996	0.00729458	0.448129
	TGN46-DeltaAAIL-GFP+TGN46-mRFP	0.883	0.897				0.962	0.977	0.97	0.983																					0.945333	6	0.0436562	0.0178226	0.627782
	TGN46-GFP+ST-mCherry	0.631	0.636	0.615			0.852	0.838	0.786	0.735																					0.727571	7	0.101267	0.0382752	1
	TGN46-DeltaAA-GFP+ST-mCherry	0.674	0.373	0.463			0.455	0.551	0.883	0.744	0.566																				0.588625	8	0.169092	0.0597832	0.110852
	TGN46-DeltaAAIL-GFP+ST-mCherry	0.482	0.52				0.707	0.647	0.898	0.838																					0.682	6	0.166785	0.0680896	0.556467

## Sheet: 20150410
Image	Rr	R	ch1:ch2	M1	M2	Ch1 Thresh	Ch2 Thresh
C2-20150410.lif - TGN46-DeltaAAIL-GFP+ST-cherry_ceramide II and C1-20150410.lif - TGN46-DeltaAAIL-GFP+ST-cherry_ceramide II	0.482	0.576	1	1	1	0; 0	0; 0
C2-20150410.lif - TGN46-DeltaAAIL-GFP+ST-cherry_ceramide I and C1-20150410.lif - TGN46-DeltaAAIL-GFP+ST-cherry_ceramide I	0.52	0.639	1	1	1	0; 0	0; 0
C2-20150410.lif - TGN46-DeltaAAIL-GFP+ST-cherry_ethanol II and C1-20150410.lif - TGN46-DeltaAAIL-GFP+ST-cherry_ethanol II	0.709	0.768	1	1	1	0; 0	0; 0
C2-20150410.lif - TGN46-DeltaAAIL-GFP+ST-cherry_ethanol I and C1-20150410.lif - TGN46-DeltaAAIL-GFP+ST-cherry_ethanol I	0.828	0.868	1	1	1	0; 0	0; 0
C2-20150410.lif - TGN46-DeltaAAIL-GFP+TGN46-mRFP_ceramide II and C1-20150410.lif - TGN46-DeltaAAIL-GFP+TGN46-mRFP_ceramide II	0.883	0.919	1	1	1	0; 0	0; 0
C2-20150410.lif - TGN46-DeltaAAIL-GFP+TGN46-mRFP_ceramide I and C1-20150410.lif - TGN46-DeltaAAIL-GFP+TGN46-mRFP_ceramide I	0.897	0.927	1	1	1	0; 0	0; 0
C2-20150410.lif - TGN46-DeltaAAIL-GFP+TGN46-mRFP_ethanol II and C1-20150410.lif - TGN46-DeltaAAIL-GFP+TGN46-mRFP_ethanol II	0.847	0.917	1	1	1	0; 0	0; 0
C2-20150410.lif - TGN46-DeltaAAIL-GFP+TGN46-mRFP_ethanol I and C1-20150410.lif - TGN46-DeltaAAIL-GFP+TGN46-mRFP_ethanol I	0.734	0.842	1	1	1	0; 0	0; 0
C2-20150410.lif - TGN46-DeltaAA-GFP+ST-cherry_ceramide II and C1-20150410.lif - TGN46-DeltaAA-GFP+ST-cherry_ceramide II	0.674	0.789	1	1	1	0; 0	0; 0
C2-20150410.lif - TGN46-DeltaAA-GFP+ST-cherry_ceramide I and C1-20150410.lif - TGN46-DeltaAA-GFP+ST-cherry_ceramide I	0.373	0.505	1	1	1	0; 0	0; 0
C2-20150410.lif - TGN46-DeltaAA-GFP+ST-cherry_ceramide I and C1-20150410.lif - TGN46-DeltaAA-GFP+ST-cherry_ceramide I	0.463	0.622	1	1	1	0; 0	0; 0
C2-20150410.lif - TGN46-DeltaAA-GFP+ST-cherry_ethanol II and C1-20150410.lif - TGN46-DeltaAA-GFP+ST-cherry_ethanol II	0.713	0.814	1	1	1	0; 0	0; 0
C2-20150410.lif - TGN46-DeltaAA-GFP+ST-cherry_ethanol II and C1-20150410.lif - TGN46-DeltaAA-GFP+ST-cherry_ethanol II	0.808	0.869	1	1	1	0; 0	0; 0
C2-20150410.lif - TGN46-DeltaAA-GFP+ST-cherry_ethanol I and C1-20150410.lif - TGN46-DeltaAA-GFP+ST-cherry_ethanol I	0.809	0.857	1	1	1	0; 0	0; 0
C2-20150410.lif - TGN46-DeltaAA-GFP+TGN46-mRFP_ceramide II and C1-20150410.lif - TGN46-DeltaAA-GFP+TGN46-mRFP_ceramide II	0.949	0.962	1	1	1	0; 0	0; 0
C2-20150410.lif - TGN46-DeltaAA-GFP+TGN46-mRFP_ceramide I and C1-20150410.lif - TGN46-DeltaAA-GFP+TGN46-mRFP_ceramide I	0.965	0.971	1	1	1	0; 0	0; 0
C2-20150410.lif - TGN46-DeltaAA-GFP+TGN46-mRFP_ethanol II and C1-20150410.lif - TGN46-DeltaAA-GFP+TGN46-mRFP_ethanol II	0.736	0.849	1	1	1	0; 0	0; 0
C2-20150410.lif - TGN46-DeltaAA-GFP+TGN46-mRFP_ethanol I and C1-20150410.lif - TGN46-DeltaAA-GFP+TGN46-mRFP_ethanol I	0.906	0.947	1	1	1	0; 0	0; 0
C2-20150410.lif - TGN46-GFP+ST-cherry_ceramide II and C1-20150410.lif - TGN46-GFP+ST-cherry_ceramide II	0.631	0.763	1	1	1	0; 0	0; 0
C2-20150410.lif - TGN46-GFP+ST-cherry_ceramide II and C1-20150410.lif - TGN46-GFP+ST-cherry_ceramide II	0.636	0.769	1	1	1	0; 0	0; 0
C2-20150410.lif - TGN46-GFP+ST-cherry_ceramide I and C1-20150410.lif - TGN46-GFP+ST-cherry_ceramide I	0.615	0.693	1	1	1	0; 0	0; 0
C2-20150410.lif - TGN46-GFP+ST-cherry_ethanol II and C1-20150410.lif - TGN46-GFP+ST-cherry_ethanol II	0.848	0.892	1	1	1	0; 0	0; 0
C2-20150410.lif - TGN46-GFP+ST-cherry_ethanol I and C1-20150410.lif - TGN46-GFP+ST-cherry_ethanol I	0.871	0.892	1	1	1	0; 0	0; 0
C2-20150410.lif - TGN46-GFP+TGN46-mRFP_ceramide II and C1-20150410.lif - TGN46-GFP+TGN46-mRFP_ceramide II	0.967	0.973	1	1	1	0; 0	0; 0
C2-20150410.lif - TGN46-GFP+TGN46-mRFP_ceramide stack I and C1-20150410.lif - TGN46-GFP+TGN46-mRFP_ceramide stack I	0.908	0.929	1	1	1	0; 0	0; 0
C2-20150410.lif - TGN46-GFP+TGN46-mRFP_ceramide stack I and C1-20150410.lif - TGN46-GFP+TGN46-mRFP_ceramide stack I	0.907	0.908	1	1	1	0; 0	0; 0
C2-20150410.lif - TGN46-GFP+TGN46-mRFP_ceramide I and C1-20150410.lif - TGN46-GFP+TGN46-mRFP_ceramide I	0.97	0.975	1	1	1	0; 0	0; 0
C2-20150410.lif - TGN46-GFP+TGN46-mRFP_ceramide I and C1-20150410.lif - TGN46-GFP+TGN46-mRFP_ceramide I	0.971	0.979	1	1	1	0; 0	0; 0
C2-20150410.lif - TGN46-GFP+TGN46-mRFP_ethanol III and C1-20150410.lif - TGN46-GFP+TGN46-mRFP_ethanol III	0.783	0.883	1	1	1	0; 0	0; 0
C2-20150410.lif - TGN46-GFP+TGN46-mRFP_ethanol II and C1-20150410.lif - TGN46-GFP+TGN46-mRFP_ethanol II	0.828	0.91	1	1	1	0; 0	0; 0
C2-20150410.lif - TGN46-GFP+TGN46-mRFP_ethanol I and C1-20150410.lif - TGN46-GFP+TGN46-mRFP_ethanol I	0.978	0.984	1	1	1	0; 0	0; 0
C2-20150410.lif - TGN46-GFP+TGN46-mRFP_ethanol I and C1-20150410.lif - TGN46-GFP+TGN46-mRFP_ethanol I	0.972	0.986	1	1	1	0; 0	0; 0
C2-20150410.lif - TGN46-GFP+TGN46-mRFP_ethanol I and C1-20150410.lif - TGN46-GFP+TGN46-mRFP_ethanol I	0.948	0.968	1	1	1	0; 0	0; 0

## Sheet: 20150421
Image	Rr	R	ch1:ch2	M1	M2	Ch1 Thresh	Ch2 Thresh
C2-20150421.lif - TGN46-DeltaAAIL-GFP+ST-mCherry_ceramide II and C1-20150421.lif - TGN46-DeltaAAIL-GFP+ST-mCherry_ceramide II	0.707	0.805	1	1	1	0; 0	0; 0
C2-20150421.lif - TGN46-DeltaAAIL-GFP+ST-mCherry_ceramide I and C1-20150421.lif - TGN46-DeltaAAIL-GFP+ST-mCherry_ceramide I	0.647	0.759	1	1	1	0; 0	0; 0
C2-20150421.lif - TGN46-DeltaAAIL-GFP+ST-mCherry_ethanol II and C1-20150421.lif - TGN46-DeltaAAIL-GFP+ST-mCherry_ethanol II	0.741	0.812	1	1	1	0; 0	0; 0
C2-20150421.lif - TGN46-DeltaAAIL-GFP+ST-mCherry_ethanol I and C1-20150421.lif - TGN46-DeltaAAIL-GFP+ST-mCherry_ethanol I	0.89	0.933	1	1	1	0; 0	0; 0
C2-20150421.lif - TGN46-DeltaAAIL-GFP+TGN46-mRFP_ceramide II and C1-20150421.lif - TGN46-DeltaAAIL-GFP+TGN46-mRFP_ceramide II	0.962	0.971	1	1	1	0; 0	0; 0
C2-20150421.lif - TGN46-DeltaAAIL-GFP+TGN46-mRFP_ceramide I and C1-20150421.lif - TGN46-DeltaAAIL-GFP+TGN46-mRFP_ceramide I	0.977	0.984	1	1	1	0; 0	0; 0
C2-20150421.lif - TGN46-DeltaAAIL-GFP+TGN46-mRFP_ethanol II and C1-20150421.lif - TGN46-DeltaAAIL-GFP+TGN46-mRFP_ethanol II	0.937	0.968	1	1	1	0; 0	0; 0
C2-20150421.lif - TGN46-DeltaAAIL-GFP+TGN46-mRFP_ethanol I and C1-20150421.lif - TGN46-DeltaAAIL-GFP+TGN46-mRFP_ethanol I	0.961	0.977	1	1	1	0; 0	0; 0
C2-20150421.lif - TGN46-DeltaAA-GFP+ST-mCherry_ceramide II and C1-20150421.lif - TGN46-DeltaAA-GFP+ST-mCherry_ceramide II	0.455	0.558	1	1	1	0; 0	0; 0
C2-20150421.lif - TGN46-DeltaAA-GFP+ST-mCherry_ceramide I and C1-20150421.lif - TGN46-DeltaAA-GFP+ST-mCherry_ceramide I	0.551	0.658	1	1	1	0; 0	0; 0
C2-20150421.lif - TGN46-DeltaAA-GFP+ST-mCherry_ethanol II and C1-20150421.lif - TGN46-DeltaAA-GFP+ST-mCherry_ethanol II	0.834	0.866	1	1	1	0; 0	0; 0
C2-20150421.lif - TGN46-DeltaAA-GFP+ST-mCherry_ethanol I and C1-20150421.lif - TGN46-DeltaAA-GFP+ST-mCherry_ethanol I	0.782	0.818	1	1	1	0; 0	0; 0
C2-20150421.lif - TGN46-DeltaAA-GFP+TGN46-mRFP_ceramide I and C1-20150421.lif - TGN46-DeltaAA-GFP+TGN46-mRFP_ceramide I	0.968	0.975	1	1	1	0; 0	0; 0
C2-20150421.lif - TGN46-DeltaAA-GFP+TGN46-mRFP_ceramide II and C1-20150421.lif - TGN46-DeltaAA-GFP+TGN46-mRFP_ceramide II	0.938	0.952	1	1	1	0; 0	0; 0
C2-20150421.lif - TGN46-DeltaAA-GFP+TGN46-mRFP_ethanol II and C1-20150421.lif - TGN46-DeltaAA-GFP+TGN46-mRFP_ethanol II	0.954	0.969	1	1	1	0; 0	0; 0
C2-20150421.lif - TGN46-DeltaAA-GFP+TGN46-mRFP_ethanol I and C1-20150421.lif - TGN46-DeltaAA-GFP+TGN46-mRFP_ethanol I	0.896	0.938	1	1	1	0; 0	0; 0
C2-20150421.lif - TGN46-GFP+ST-mCherry_ceramide II and C1-20150421.lif - TGN46-GFP+ST-mCherry_ceramide II	0.852	0.888	1	1	1	0; 0	0; 0
C2-20150421.lif - TGN46-GFP+ST-mCherry_ceramide I and C1-20150421.lif - TGN46-GFP+ST-mCherry_ceramide I	0.838	0.874	1	1	1	0; 0	0; 0
C2-20150421.lif - TGN46-GFP+ST-mCherry_ethanol II and C1-20150421.lif - TGN46-GFP+ST-mCherry_ethanol II	0.812	0.891	1	1	1	0; 0	0; 0
C2-20150421.lif - TGN46-GFP+ST-mCherry_ethanol I and C1-20150421.lif - TGN46-GFP+ST-mCherry_ethanol I	0.843	0.892	1	1	1	0; 0	0; 0
C2-20150421.lif - TGN46-GFP+TGN46-mRFP_ceramide II and C1-20150421.lif - TGN46-GFP+TGN46-mRFP_ceramide II	0.963	0.976	1	1	1	0; 0	0; 0
C2-20150421.lif - TGN46-GFP+TGN46-mRFP_ceramidel I and C1-20150421.lif - TGN46-GFP+TGN46-mRFP_ceramidel I	0.978	0.983	1	1	1	0; 0	0; 0
C2-20150421.lif - TGN46-GFP+TGN46-mRFP_ethanol II and C1-20150421.lif - TGN46-GFP+TGN46-mRFP_ethanol II	0.848	0.899	1	1	1	0; 0	0; 0
C2-20150421.lif - TGN46-GFP+TGN46-mRFP_ethanol I and C1-20150421.lif - TGN46-GFP+TGN46-mRFP_ethanol I	0.968	0.978	1	1	1	0; 0	0; 0

## Sheet: 20150423
Image	Rr	R	ch1:ch2	M1	M2	Ch1 Thresh	Ch2 Thresh
C2-20150423.lif - TGN46-DeltaAAIL-GFP+ST-mCherry_ceramide II and C1-20150423.lif - TGN46-DeltaAAIL-GFP+ST-mCherry_ceramide II	0.898	0.924	1	1	1	0; 0	0; 0
C2-20150423.lif - TGN46-DeltaAAIL-GFP+ST-mCherry_ceramide I and C1-20150423.lif - TGN46-DeltaAAIL-GFP+ST-mCherry_ceramide I	0.838	0.866	1	1	1	0; 0	0; 0
C2-20150423.lif - TGN46-DeltaAAIL-GFP+ST-mCherry_ethanol II and C1-20150423.lif - TGN46-DeltaAAIL-GFP+ST-mCherry_ethanol II	0.873	0.915	1	1	1	0; 0	0; 0
C2-20150423.lif - TGN46-DeltaAAIL-GFP+ST-mCherry_ethanol I and C1-20150423.lif - TGN46-DeltaAAIL-GFP+ST-mCherry_ethanol I	0.932	0.958	1	1	1	0; 0	0; 0
C2-20150423.lif - TGN46-DeltaAAIL-GFP+ST-mCherry_ethanol I and C1-20150423.lif - TGN46-DeltaAAIL-GFP+ST-mCherry_ethanol I	0.837	0.907	1	1	1	0; 0	0; 0
C2-20150423.lif - TGN46-DeltaAAIL-GFP+TGN46-mRFP_ceramide II and C1-20150423.lif - TGN46-DeltaAAIL-GFP+TGN46-mRFP_ceramide II	0.97	0.977	1	1	1	0; 0	0; 0
C2-20150423.lif - TGN46-DeltaAAIL-GFP+TGN46-mRFP_ceramide I and C1-20150423.lif - TGN46-DeltaAAIL-GFP+TGN46-mRFP_ceramide I	0.983	0.988	1	1	1	0; 0	0; 0
C2-20150423.lif - TGN46-DeltaAAIL-GFP+TGN46-mRFP_ethanol II and C1-20150423.lif - TGN46-DeltaAAIL-GFP+TGN46-mRFP_ethanol II	0.966	0.98	1	1	1	0; 0	0; 0
C2-20150423.lif - TGN46-DeltaAAIL-GFP+TGN46-mRFP_ethanol I and C1-20150423.lif - TGN46-DeltaAAIL-GFP+TGN46-mRFP_ethanol I	0.969	0.98	1	1	1	0; 0	0; 0
C2-20150423.lif - TGN46-DeltaAA-GFP+TGN46-mRFP_ceramide II and C1-20150423.lif - TGN46-DeltaAA-GFP+TGN46-mRFP_ceramide II	0.917	0.936	1	1	1	0; 0	0; 0
C2-20150423.lif - TGN46-DeltaAA-GFP+TGN46-mRFP_ceramide I and C1-20150423.lif - TGN46-DeltaAA-GFP+TGN46-mRFP_ceramide I	0.928	0.939	1	1	1	0; 0	0; 0
C2-20150423.lif - TGN46-DeltaAA-GFP+TGN46-mRFP_ceramide I and C1-20150423.lif - TGN46-DeltaAA-GFP+TGN46-mRFP_ceramide I	0.93	0.942	1	1	1	0; 0	0; 0
C2-20150423.lif - TGN46-DeltaAA-GFP+ST-mCherry_ceramide II and C1-20150423.lif - TGN46-DeltaAA-GFP+ST-mCherry_ceramide II	0.883	0.883	1	1	1	0; 0	0; 0
C2-20150423.lif - TGN46-DeltaAA-GFP+ST-mCherry_ceramide II and C1-20150423.lif - TGN46-DeltaAA-GFP+ST-mCherry_ceramide II	0.744	0.794	1	1	1	0; 0	0; 0
C2-20150423.lif - TGN46-DeltaAA-GFP+ST-mCherry_ceramide I and C1-20150423.lif - TGN46-DeltaAA-GFP+ST-mCherry_ceramide I	0.566	0.641	1	1	1	0; 0	0; 0
C2-20150423.lif - TGN46-DeltaAA-GFP+ST-mCherry_ethanol II and C1-20150423.lif - TGN46-DeltaAA-GFP+ST-mCherry_ethanol II	0.908	0.93	1	1	1	0; 0	0; 0
C2-20150423.lif - TGN46-DeltaAA-GFP+TGN46-mRFP_ethanol II and C1-20150423.lif - TGN46-DeltaAA-GFP+TGN46-mRFP_ethanol II	0.92	0.954	1	1	1	0; 0	0; 0
C2-20150423.lif - TGN46-DeltaAA-GFP+TGN46-mRFP_ethanol I and C1-20150423.lif - TGN46-DeltaAA-GFP+TGN46-mRFP_ethanol I	0.933	0.956	1	1	1	0; 0	0; 0
C2-20150423.lif - TGN46-DeltaAA-GFP+ST-mCherry_ethanol I and C1-20150423.lif - TGN46-DeltaAA-GFP+ST-mCherry_ethanol I	0.637	0.768	1	1	1	0; 0	0; 0
C2-20150423.lif - TGN46-GFP+ST-mCherry_ceramide II and C1-20150423.lif - TGN46-GFP+ST-mCherry_ceramide II	0.786	0.82	1	1	1	0; 0	0; 0
C2-20150423.lif - TGN46-GFP+ST-mCherry_ceramide I and C1-20150423.lif - TGN46-GFP+ST-mCherry_ceramide I	0.735	0.756	1	1	1	0; 0	0; 0
C2-20150423.lif - TGN46-GFP+ST-mCherry_ethanol II and C1-20150423.lif - TGN46-GFP+ST-mCherry_ethanol II	0.875	0.906	1	1	1	0; 0	0; 0
C2-20150423.lif - TGN46-GFP+ST-mCherry_ethanol I and C1-20150423.lif - TGN46-GFP+ST-mCherry_ethanol I	0.803	0.847	1	1	1	0; 0	0; 0
C2-20150423.lif - TGN46-GFP+TGN46-mRFP_ceramide II and C1-20150423.lif - TGN46-GFP+TGN46-mRFP_ceramide II	0.961	0.972	1	1	1	0; 0	0; 0
C2-20150423.lif - TGN46-GFP+TGN46-mRFP_ceramide I and C1-20150423.lif - TGN46-GFP+TGN46-mRFP_ceramide I	0.964	0.97	1	1	1	0; 0	0; 0
C2-20150423.lif - TGN46-GFP+TGN46-mRFP_ethanol II and C1-20150423.lif - TGN46-GFP+TGN46-mRFP_ethanol II	0.937	0.954	1	1	1	0; 0	0; 0
c:2/2; z:1/5 - TGN46-GFP+TGN46-mRFP_ethanol I and c:1/2; z:1/5 - TGN46-GFP+TGN46-mRFP_ethanol I	0.913	0.93	1	1	1	0; 0	0; 0
