# Supplementary material for: Sorting of secretory proteins at the trans-Golgi network by human TGN46
Source: eLife journal article supplement (doi:10.7554/elife.91708), 2023-10-24

Uncropped gel image of Figure 1A

***Anti-TGN46***  
(2nd blot from top)

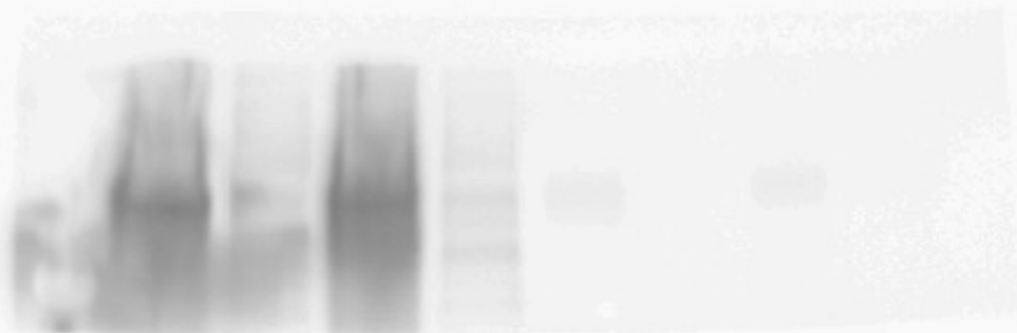

***Anti-myc***  
(1st blot from top)

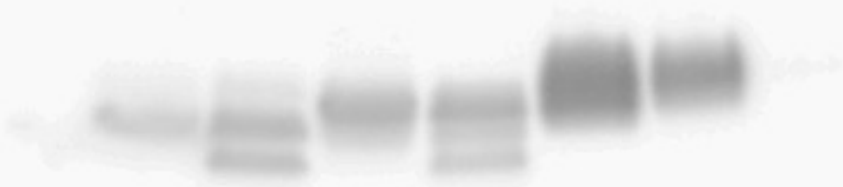

Uncropped gel image of Figure 1A

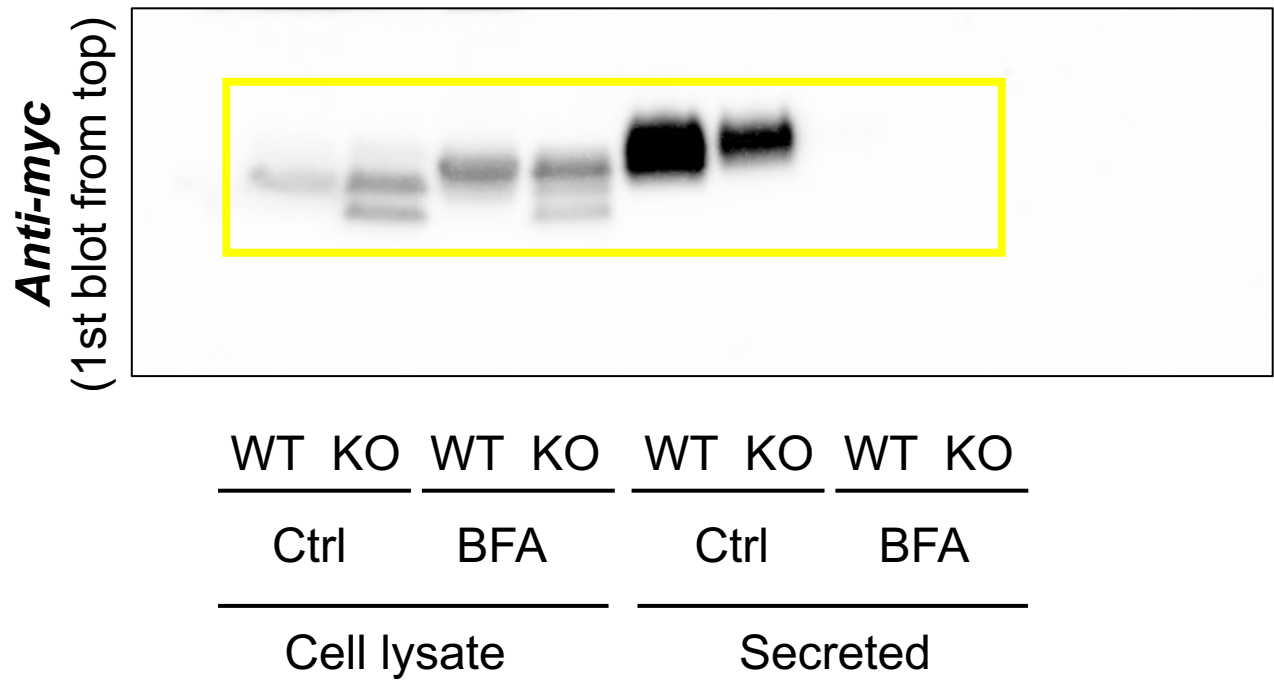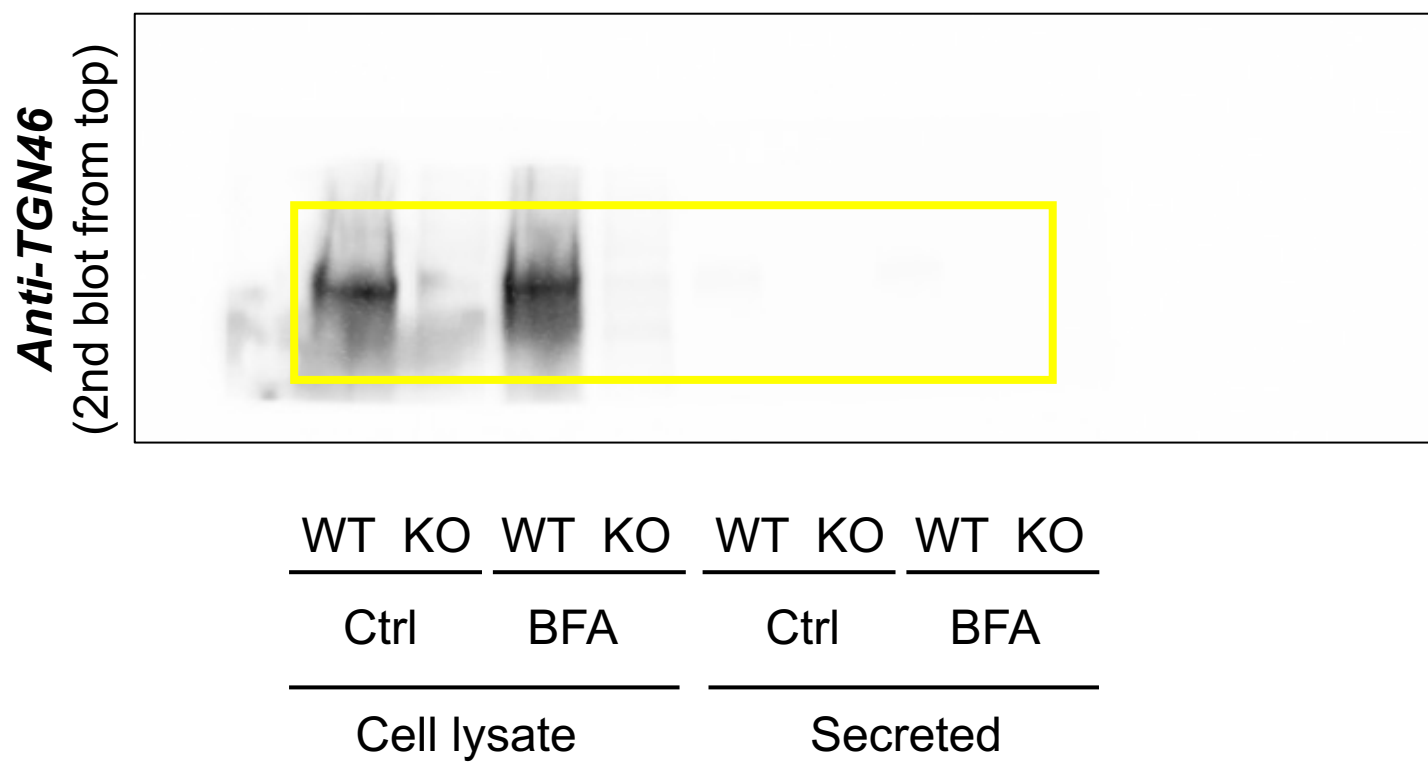

Supplement: fig1-data1 [file elife-91708-fig1-data1-v1.zip]
